# Supplementary material
Source: PubMed Central journal article supplement (PMC4215905)
Supplement: bm500750v_si_001.pdf [file bm500750v_si_001.pdf]

# Interaction of human plasma proteins with thin gelatin-based hydrogel films: a QCM-D and ToF- SIMS study

*Sina M. S. Schönwälder<sup>+</sup>, Florence Bally<sup>+~</sup>, Lars Heinke<sup>+</sup>, Carlos Azucena<sup>+</sup>, Özgül D. Bulut<sup>+</sup>, Stefan Heißler<sup>+</sup>, Frank Kirschhöfer<sup>+</sup>, Tim P. Gebauer<sup>§,&</sup>, Axel T. Neffe<sup>§,&</sup>, Andreas Lendlein<sup>§,&</sup>, Gerald Brenner-Weiß<sup>+</sup>, Jörg Lahann<sup>+</sup>, Alexander Welle<sup>+,&</sup>, Jörg Overhage<sup>+</sup>, Christof Wöll<sup>+,\*</sup>*

<sup>+</sup>Karlsruhe Institute of Technology (KIT), Institute of Functional Interfaces (IFG), 76344 Eggenstein-Leopoldshafen, Germany

<sup>~</sup>University of Upper Alsace (UHA), Institute of Materials Science of Mulhouse (IS2M, UMR 7361), 68093 Mulhouse, France

<sup>§</sup>Helmholtz-Zentrum Geesthacht, Institute of Biomaterial Science, 14513 Teltow, Germany

<sup>&</sup>Helmholtz Virtual Institute - Multifunctional Biomaterials for Medicine, Teltow and Berlin, Germany

<sup>§</sup> Karlsruhe Nano Micro Facility (KNMF), Karlsruhe Institute of Technology (KIT), 76344 Eggenstein-Leopoldshafen, Germany

\*E-mail: [christof.woell@kit.edu](mailto:christof.woell@kit.edu)

Tel.: +49 721 608 23934. Fax: +49 721 608 23478

## Surface analysis of poly(*p*-xylylene) and poly(4-aminomethyl-*p*-xylylene-*co-p*-xylylene) by ToF-SIMS

Poly(*p*-xylylene) and poly(4-aminomethyl-*p*-xylylene-*co-p*-xylylene), non-functionalized and amino-functionalized parylenes were analyzed by ToF-SIMS. Based on these analyses, the presence of amine groups on the amino-functionalized CVD polymer was proven. As shown in Figure SI-1, the amino-functionalized CVD polymer is characterized by several  $C_xNH_y$  peaks in the positive polarity secondary ions spectrum.

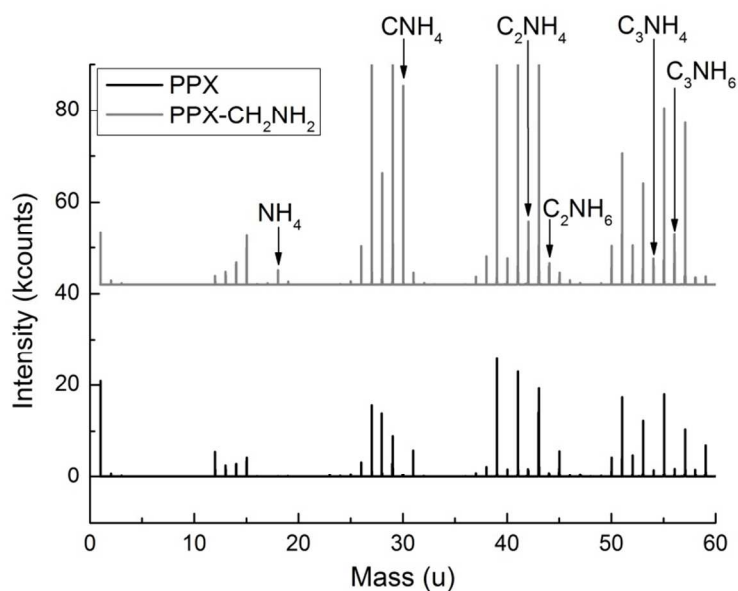

Figure SI-1. Positive polarity ToF-SIMS spectra of amino-functionalized parylene (up, grey) and non-functionalized parylene (down, black). Fragments indicating the presence of amine groups are marked with chemical assignments.

## Characterization of thin hydrogel films

Table SI-1. Tentative assignment of some bands frequently found in IRRAS spectra of biological materials<sup>1</sup> and measured bands.

| <b>Label</b> | <b>Wavenumber measured bands<br/>[cm<sup>-1</sup>]</b> | <b>Assignment<sup>1</sup></b>      |
|--------------|--------------------------------------------------------|------------------------------------|
| A            | 3300-3600                                              | O-H str. of hydroxyl groups        |
| B            | 3200-3300                                              | N-H str. of amide groups           |
| C            | 2800-2950                                              | C-H str. (sym) of -CH <sub>3</sub> |
| D            | 1600-1700                                              | Amide I band                       |
| E            | 1400-1550                                              | Amide II band                      |
| F            | 1300-1400                                              | Amide III band                     |

## Quartz Crystal Microbalance with Dissipation monitoring - Viscoelastic model

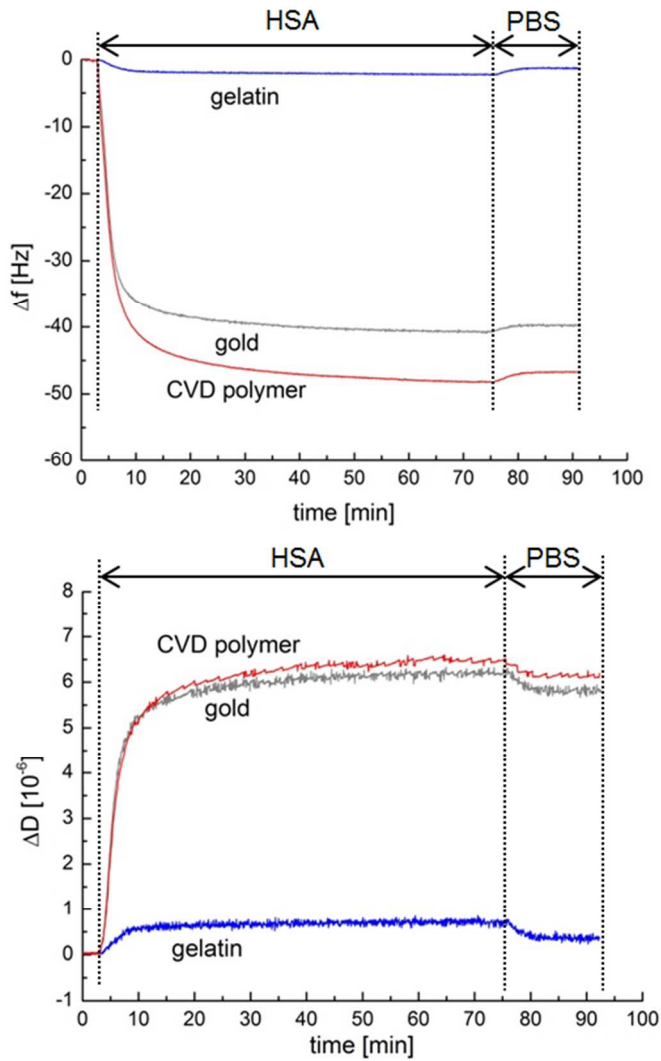

Figure SI-2. Frequency shifts (a) and dissipation shifts (b) during HSA adsorption on CVD coating (red), bare gold (grey) and gelatin-based hydrogel (blue) at third overtone ( $f = 15$  MHz) at  $37$  °C.

## Slope in $\Delta D/(-\Delta f)$ -Plot

The ratio  $\frac{\Delta \Gamma}{-\Delta f}$  measured for a thin soft film on a QCM-D sensor in a liquid is derived<sup>2</sup> to

$$\frac{\Delta \Gamma_n}{-\Delta f_n} = 2\pi n f_0 \eta J'_f, \quad (\text{eq.1}).$$

where  $f$  denotes the resonance frequency,  $\Gamma$  the imaginary part of the resonance frequency,  $n$  is the harmonic order,  $f_0$  is the fundamental frequency,  $\eta$  is the viscosity of the liquid and  $J'_f$  is the real part of the shear compliance. The  $\Delta$  indicates the difference to the reference state (i.e. initial values).

By using the relation between the dissipation  $D$  and  $\Gamma$  (i.e.  $D=2\Gamma/f$ ) and knowing that  $f_n \approx n f_0$ , we can rewrite eq.1 as

$$J'_f = \frac{1}{4\pi\eta} \frac{\Delta D_n}{-\Delta f_n} \quad (\text{eq.2}).$$

The shear compliance is defined as  $J=1/G$ , with  $G$  denoting the shear modulus. If the film is much more rigid than the liquid (which is the case here), the imaginary part of the compliance  $J''_f$  is much smaller than  $J'^2_f$  and  $G'=1/J'$  follows. This means the shear modulus of the thin film can be determined by

$$G_f = \frac{4\pi\eta}{\Delta D_n / -\Delta f_n} \quad (\text{eq.3}).$$

$\Delta D_n/(-\Delta f_n)$  values during the protein adsorption process

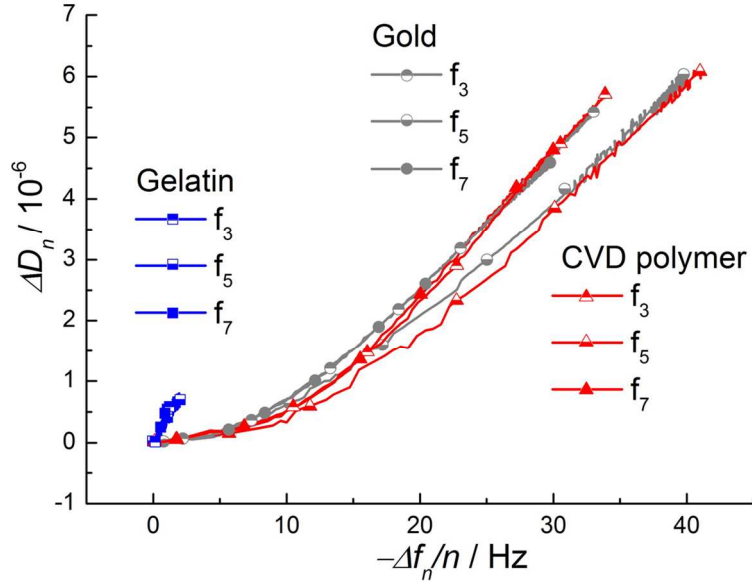

Figure SI-3.  $\Delta D_n/(-\Delta f_n)$  values during the adsorption process of HSA on the gelatin-based hydrogel (blue shades; squares), on bare gold (grey shades; circles) and on the CVD polymer (magenta shades; triangles). For sake of clarity, only the third, the fifth and the seventh resonance frequencies are shown.

## Detailed characterization of the adsorption kinetic by exponential fitting

Assuming identical time constants for the initial protein adsorption  $t_1 = 150$  s (determined by exponential fitting of recorded  $-\Delta f$  curve from gold,  $t_1 = 134$  s, respectively CVD,  $t_1 = 149$  s), the measured  $-\Delta f$  curve of the protein adsorption on the gelatin hydrogel can be fitted nicely by using an exponential fit.

To suppose a two-step process with a time constant  $t_1 = 150$  s (protein accumulation on top) and  $t_2 = 3300$  s (protein diffusion in the gel), the calculated values  $A_1 = 126,5$  and  $A_2 = 33,2$  leads to a ratio 4:1 of adsorbed and diffused fibrinogen on, respectively in the hydrogel.

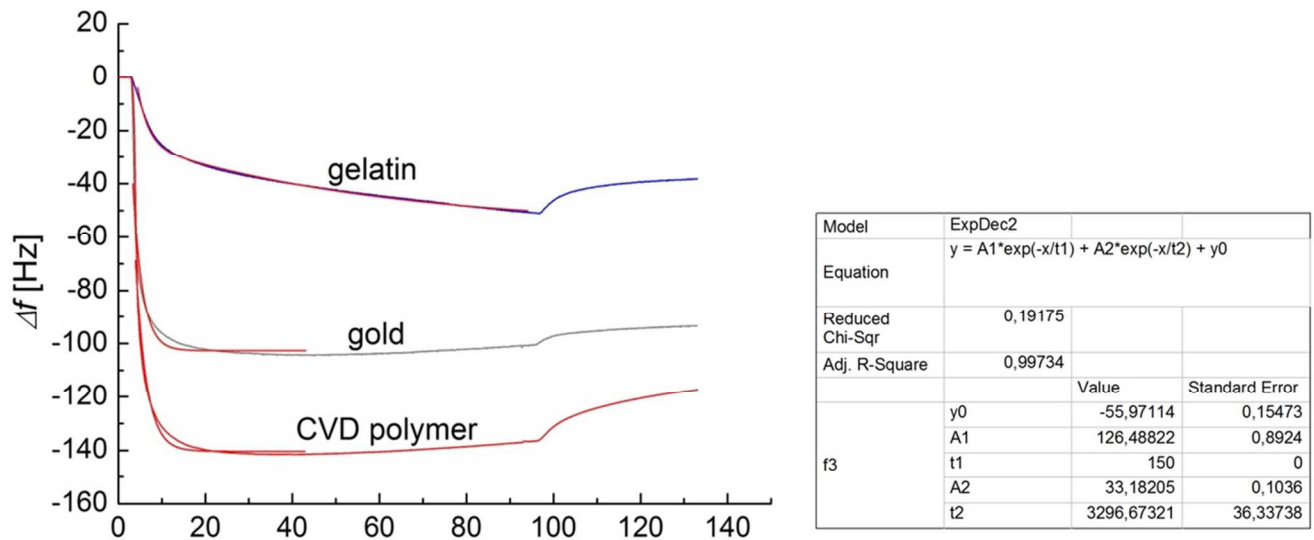

Figure SI-4: Exponential fits of the  $-\Delta f$  values from fibrinogen adsorption on gelatin-based hydrogel, gold and CVD polymer.

### $\Delta D/(-\Delta f)$ ratios and calculated shear moduli

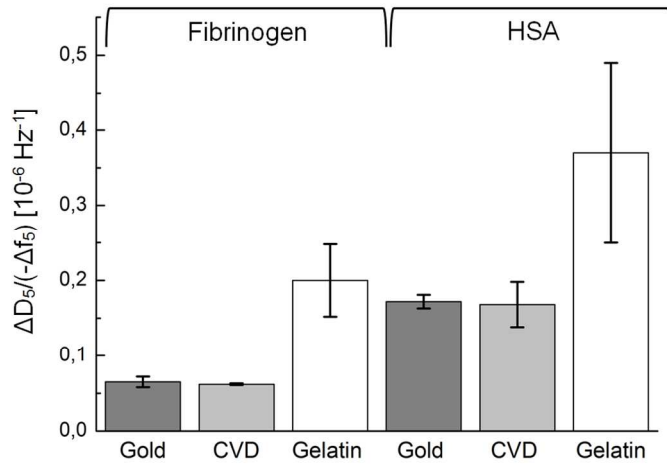

Figure SI-5:  $\Delta D/(-\Delta f)$  ratio of the adsorbed wetted protein mass on the gelatin-based hydrogel, gold and the CVD functionalized substrate at fifth overtone.

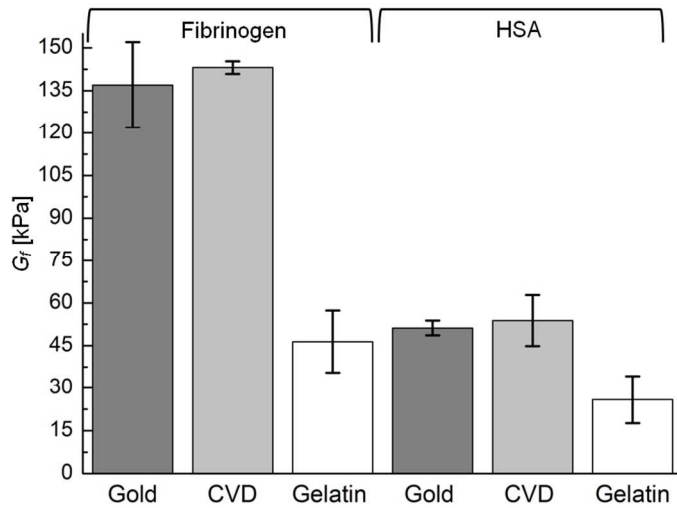

Figure SI-6: Shear moduli from the adsorbed wetted protein mass on the gelatin-based hydrogel, gold and the CVD functionalized substrate at fifth overtone calculated by eq. 3 (see Supporting Information, page 5).



**Additional characterization of the gelatin-based hydrogel film with and without adsorbed fibrinogen respectively HSA using ToF-SIMS and principal component analysis**

Table SI-2. Principal component analysis of gelatin and fibrinogen respectively HSA.

Determined mass [amu], loadings for PC1 and PC2, chemical assignment of the fragment (positive polarity) and amino acid origin (see also Figure 7 main text).

| <b>Mass</b> | <b>PC1</b> | <b>PC2</b> | <b>Assignment</b>                            | <b>Amino Acid (Code)</b> |
|-------------|------------|------------|----------------------------------------------|--------------------------|
| 30.04       | -0.46      | -0.21      | CH <sub>4</sub> N                            | Glycine (Gly, G)         |
| 43.03       | 0.16       | -0.23      | CH <sub>3</sub> N <sub>2</sub>               | Arginine (Arg, R)        |
| 44.05       | -0.13      | -0.31      | C <sub>2</sub> H <sub>6</sub> N              | Alanine (Ala, A)         |
| 44.98       | 0.01       | -0.03      | CHS                                          | Cysteine (Cys, C)        |
| 60.05       | -0.01      | -0.01      | C <sub>2</sub> H <sub>6</sub> NO             | Serine (Ser, S)          |
| 61.01       | 0.02       | -0.09      | C <sub>2</sub> H <sub>5</sub> S              | Methionine (Met, M)      |
| 68.05       | -0.33      | -0.08      | C <sub>4</sub> H <sub>6</sub> N              | Proline (Pro, P)         |
| 69.03       | -0.07      | -0.05      | C <sub>4</sub> H <sub>5</sub> O              | Threonine (Thr, T)       |
| 70.03       | -0.10      | 0.03       | C <sub>3</sub> H <sub>4</sub> NO             | Asparagine (Asn, N)      |
| 70.07       | -0.44      | -0.06      | C <sub>4</sub> H <sub>8</sub> N              | Proline (Pro, P)         |
| 71.01       | 0.00       | 0.02       | C <sub>3</sub> H <sub>3</sub> O <sub>2</sub> | Serine (Ser, S)          |
| 72.08       | 0.03       | -0.07      | C <sub>4</sub> H <sub>10</sub> N             | Valine (Val, V)          |
| 73.07       | 0.24       | -0.43      | C <sub>2</sub> H <sub>7</sub> N <sub>3</sub> | Arginine (Arg, R)        |
| 74.06       | 0.07       | -0.04      | C <sub>3</sub> H <sub>8</sub> NO             | Threonine (Thr, T)       |
| 81.04       | 0.01       | -0.07      | C <sub>4</sub> H <sub>5</sub> N <sub>2</sub> | Histidine (His, H)       |

|        |       |       |                                                |                           |
|--------|-------|-------|------------------------------------------------|---------------------------|
| 82.06  | -0.17 | -0.04 | C <sub>4</sub> H <sub>6</sub> N <sub>2</sub>   | Histidine<br>(His, H)     |
| 83.05  | -0.02 | -0.01 | C <sub>5</sub> H <sub>7</sub> O                | Valine<br>(Val, V)        |
| 84.05  | -0.14 | -0.05 | C <sub>4</sub> H <sub>6</sub> NO               | Glutamic Acid<br>(Glu, E) |
| 84.09  | -0.46 | 0.09  | C <sub>5</sub> H <sub>10</sub> N               | Lysine<br>(Lys, K)        |
| 86.10  | 0.02  | -0.41 | C <sub>5</sub> H <sub>12</sub> N               | Leucine<br>(Leu, L)*      |
| 87.05  | 0.10  | 0.26  | C <sub>3</sub> H <sub>7</sub> N <sub>2</sub> O | Asparagine<br>(Asn, N)    |
| 88.04  | -0.02 | 0.04  | C <sub>3</sub> H <sub>6</sub> NO <sub>2</sub>  | Aspartic Acid<br>(Asp, D) |
| 98.02  | -0.04 | 0.09  | C <sub>4</sub> H <sub>4</sub> NO <sub>2</sub>  | Asparagine<br>(Asn, N)    |
| 100.09 | 0.11  | -0.36 | C <sub>4</sub> H <sub>10</sub> N <sub>3</sub>  | Arginine<br>(Arg, R)      |
| 101.1  | 0.07  | -0.14 | C <sub>4</sub> H <sub>11</sub> N <sub>3</sub>  | Arginine<br>(Arg, R)      |
| 102.06 | -0.09 | 0.04  | C <sub>4</sub> H <sub>8</sub> NO <sub>2</sub>  | Glutamic Acid<br>(Glu, E) |
| 107.05 | 0.06  | 0.03  | C <sub>7</sub> H <sub>7</sub> O                | Tyrosine<br>(Tyr, Y)      |
| 110.08 | 0.04  | -0.27 | C <sub>5</sub> H <sub>8</sub> N <sub>3</sub>   | Histidine<br>(His, H)     |
| 120.08 | -0.07 | -0.22 | C <sub>8</sub> H <sub>10</sub> N               | Phenylalanine<br>(Phe, F) |
| 127.10 | -0.12 | -0.12 | C <sub>5</sub> H <sub>11</sub> N <sub>4</sub>  | Arginine<br>(Arg, R)      |
| 130.07 | 0.16  | 0.16  | C <sub>9</sub> H <sub>8</sub> N                | Tryptophan<br>(Trp, W)    |
| 131.05 | -0.01 | -0.03 | C <sub>9</sub> H <sub>7</sub> O                | Phenylalanine<br>(Phe, F) |
| 132.05 | -0.00 | -0.00 | C <sub>9</sub> H <sub>8</sub> O                | Phenylalanine<br>(Phe, F) |
| 136.09 | 0.13  | -0.14 | C <sub>8</sub> H <sub>10</sub> NO              | Tyrosine<br>(Tyr, Y)      |
| 170.07 | 0.04  | 0.04  | C <sub>11</sub> H <sub>8</sub> NO              | Tryptophan<br>(Trp, W)    |

For the principal component analysis of the secondary ion mass spectra of adsorbed protein, as shown in Figure 7 and Table SI-2, peaks in positive polarity spectra were selected based on conventional datasets<sup>3, 4</sup> of canonical poly(amino acids). Integration intervals were defined from the peak shapes in high mass resolution spectra directly (in other studies several signals with the same nominal mass are combined). The fragment CH<sub>4</sub>N is detectable also for other amino acids beside glycine. Leucine and isoleucine both yield C<sub>5</sub>H<sub>12</sub>N.

## Amino acid compositions of the studied proteins

Table SI-3. Amino acid composition of HSA<sup>5</sup>, human Fbn<sup>5</sup> and porcine gelatin<sup>6</sup>.

| Amino acid | Composition HSA<br>[mol %] | Composition human Fbn<br>[mol %] | Composition gelatin<br>[mol %] |
|------------|----------------------------|----------------------------------|--------------------------------|
| Ala (A)    | 10.34                      | 4.86                             | 11.14                          |
| Arg (R)    | 4.43                       | 5.19                             | 4.85                           |
| Asn (N)    | 2.79                       | 5.58                             | 0.0                            |
| Asp (D)    | 5.91                       | 6.19                             | 4.67                           |
| Cys (C)    | 5.75                       | 1.99                             | 0.0                            |
| Gln (Q)    | 3.28                       | 4.42                             | n.d.                           |
| Glu (E)    | 10.18                      | 6.63                             | 7.13                           |
| Gly (G)    | 2.13                       | 9.56                             | 32.61                          |
| His (H)    | 2.63                       | 2.21                             | 0.60                           |
| Ile (I)    | 1.48                       | 3.76                             | 0.96                           |
| Leu (L)    | 10.51                      | 6.57                             | 2.36                           |
| Lys (K)    | 9.85                       | 6.24                             | 2.63                           |
| Met (M)    | 1.15                       | 2.32                             | 0.55                           |
| Phe (F)    | 5.75                       | 3.37                             | 1.44                           |
| Pro (P)    | 3.94                       | 4.36                             | 13.06                          |
| Ser (S)    | 4.60                       | 9.45                             | 3.65                           |
| Thr (T)    | 4.76                       | 6.19                             | 1.71                           |
| Trp (W)    | 0.33                       | 2.43                             | 0.0                            |
| Tyr (Y)    | 3.12                       | 3.81                             | 0.31                           |
| Val (V)    | 7.06                       | 4.86                             | 2.19                           |
| Pyl (O)    | 0.0                        | 0.0                              | 0.0                            |
| Hyp        | 0.0                        | 0.0                              | 9.55                           |
| Hyl        | 0.0                        | 0.0                              | 0.6                            |

## References

1. Naumann, D., FT-infrared and FT-Raman spectroscopy in biomedical research. *Appl Spectrosc Rev* **2001**, *36*, (2-3), 239-298.
2. Du, B.; Johannsmann, D., Operation of the quartz crystal microbalance in liquids: derivation of the elastic compliance of a film from the ratio of bandwidth shift and frequency shift. *Langmuir* **2004**, *20*, (7), 2809-12.
3. Lhoest, J. B.; Wagner, M. S.; Tidwell, C. D.; Castner, D. G., Characterization of adsorbed protein films by time of flight secondary ion mass spectrometry. *J Biomed Mater Res* **2001**, *57*, (3), 432-40.
4. Wagner, M. S.; Castner, D. G., Characterization of adsorbed protein films by time-of-flight secondary ion mass spectrometry with principal component analysis. *Langmuir* **2001**, *17*, (15), 4649-4660.
5. ExPASy - SIB Bioinformatics Resource Portal. <http://www.expasy.org/>
6. Eastoe, J. E., The amino acid composition of mammalian collagen and gelatin. *Biochem J* **1955**, *61*, (4), 589-600.
